# Supplementary material for: Microplastics’ Occurrence in Edible Fish Species (Mullus barbatus and M. surmuletus) from an Italian Marine Protected Area
Source: MDPI journal article supplement (doi:10.3390/microplastics1020021), 2022-05-18
Supplement: s1 [file s1]

# Supplementary Materials of

## Microplastics' Occurrence in Edible Fish Species (*Mullus barbatus* and *M. surmuletus*) from an Italian Marine Protected Area

Serena Fellingine <sup>1</sup>, Manuela Piccardo <sup>2,\*</sup>, Giuseppe Egidio De Benedetto <sup>3,\*</sup>, Cosimino Malitesta <sup>4</sup>  
and Antonio Terlizzi <sup>1,2,5</sup>

<sup>1</sup> Consorzio Nazionale Interuniversitario per le Scienze del Mare, 00196 Roma, Italy; fellingine@conisma.it (S.F.); aterlizzi@units.it (A.T.)

<sup>2</sup> Dipartimento di Scienze della Vita, Università di Trieste, 34127 Trieste, Italy

<sup>3</sup> Dipartimento di Beni Culturali, Università del Salento, 73100 Lecce, Italy

<sup>4</sup> Dipartimento di Scienze e Tecnologie Biologiche ed Ambientali, Università del Salento, 73100 Lecce, Italy; cosimino.malitesta@unisalento.it

<sup>5</sup> Stazione Zoologica Anton Dohrn, 80121 Napoli, Italy

\* Correspondence: manuela.piccardo@units.it (M.P.); giuseppe.debenedetto@unisalento.it (G.E.D.B.)

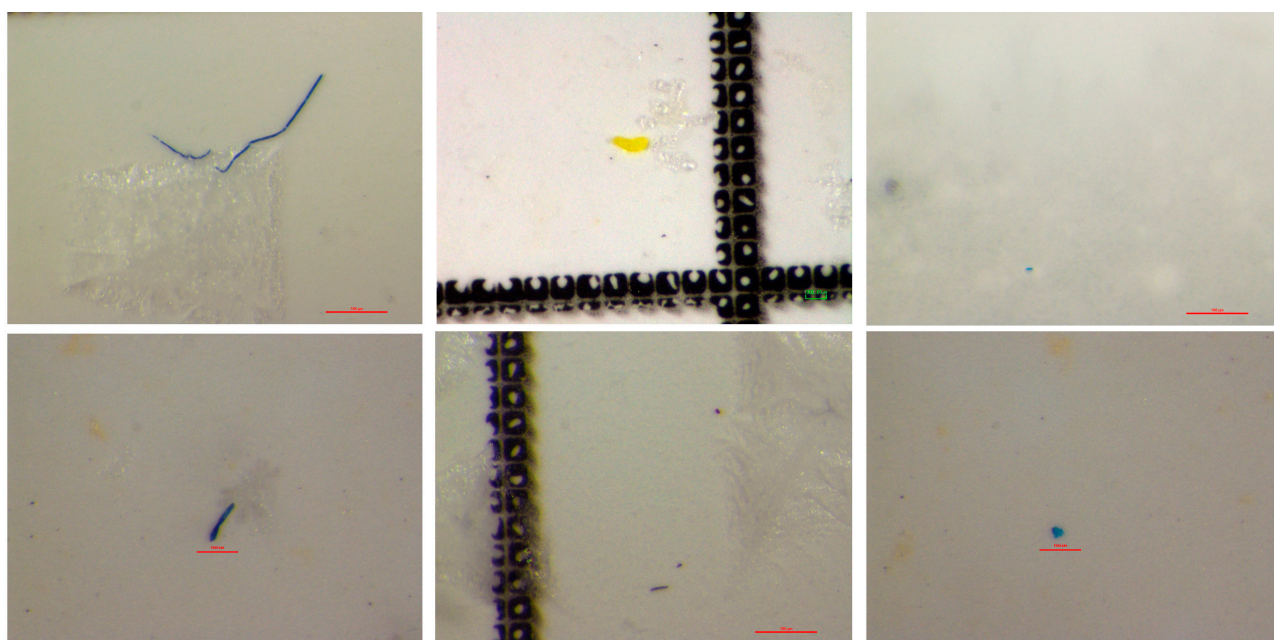

**Figure S1.** Examples of microplastics extracted from the gastrointestinal contents of *M. surmuletus* and *M. barbatus*. The red lines are the scale: 100 microns in the top right, top left and bottom center photos; 1000 microns for the remaining photos.
